# Supplementary material for: Deep eutectic solvent mediated synthesis and fabrication of a WO3–MgO nanocomposite as an electrode material for energy storage applications
Source: Royal Society of Chemistry journal article supplement (doi:10.1039/d2nj05642a), 2022-12-27
Supplement: d2nj05642a1.pdf [file d2nj05642a1.pdf]

**Deep Eutectic Solvent mediated synthesis and fabrication of WO<sub>3</sub>-MgO nanocomposite  
as an electrode material for energy storage applications**

C. Joel<sup>1</sup>, R. Biju Bennie<sup>1\*</sup>, A. Jerold Antony<sup>2</sup>, A. Nirmal Paul Raj<sup>1</sup>, G. Selvakumar<sup>1</sup>

<sup>1</sup>Postgraduate Department of Chemistry, St. John's College, Tirunelveli-627002, Tamil Nadu, India.

<sup>2</sup>Department of Chemistry, St. Xavier's College (Autonomous), Tirunelveli-627002, Tamil Nadu, India.

**Electronic supplementary Information**

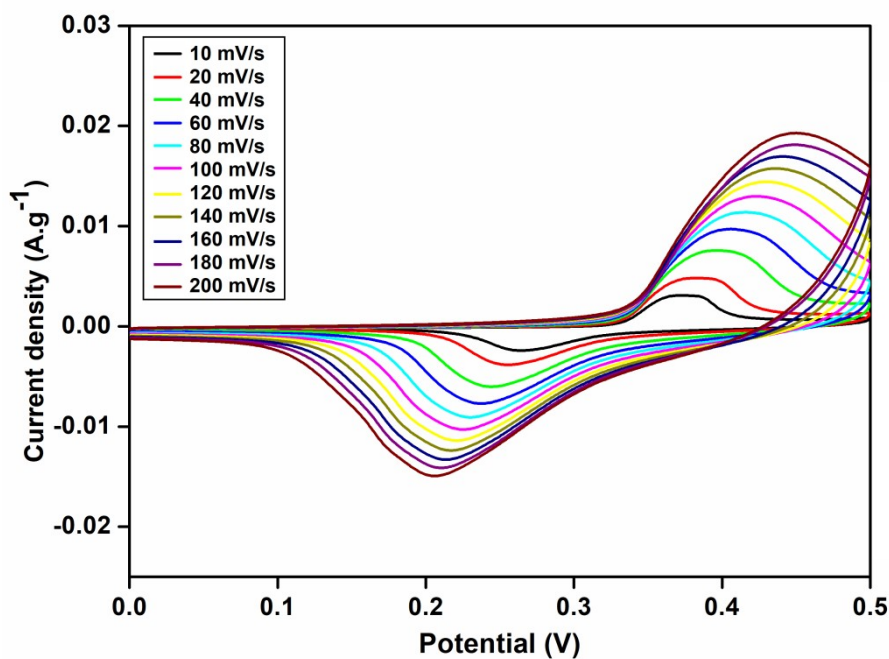

**Fig S1: CV curves of WO<sub>3</sub> nanoparticles at varying scan rates**

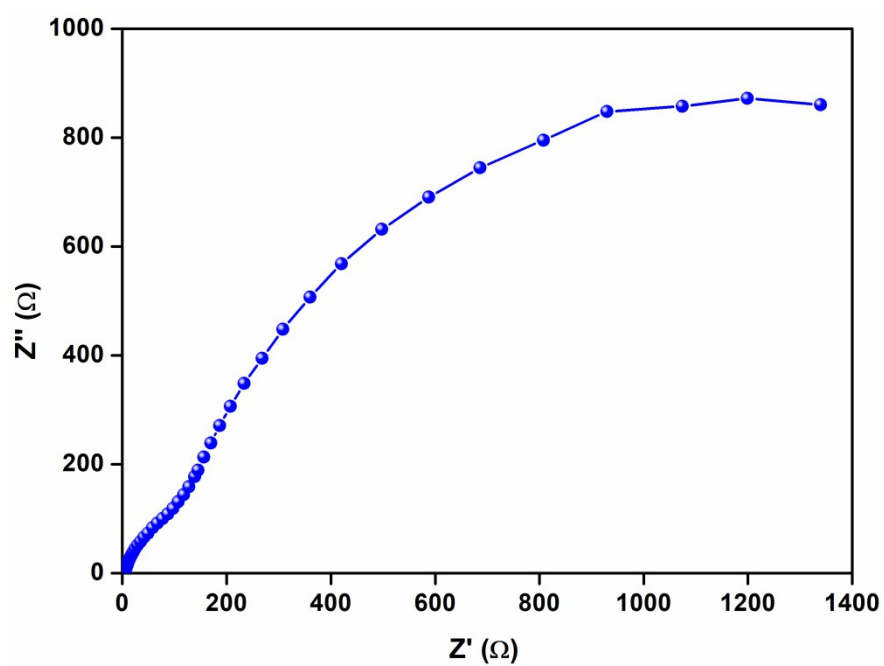

**Fig S2: (a) Nyquist plot for WO<sub>3</sub> nanoparticles**

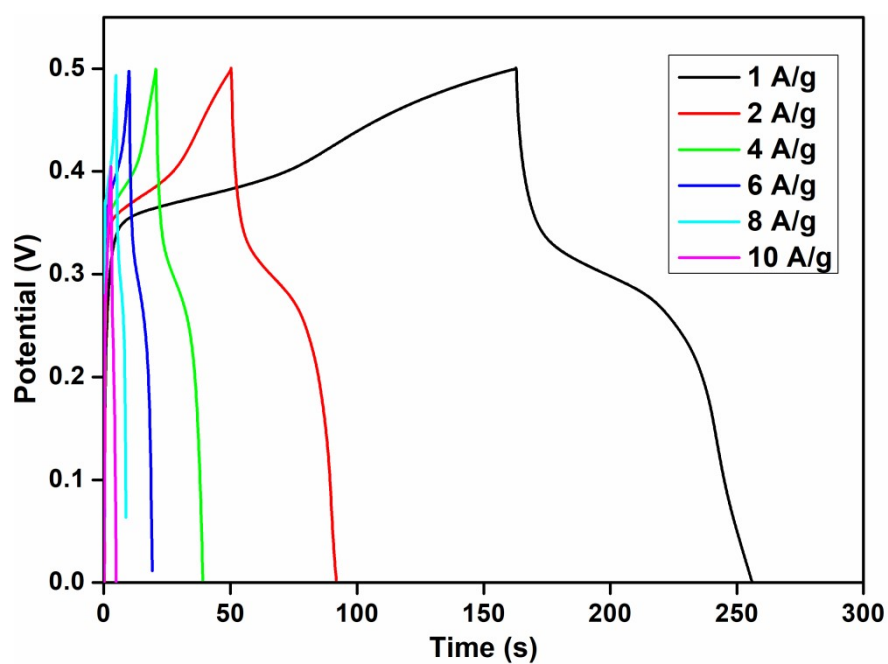

**Fig S3: Galvanostatic charge-discharge (GCD) curves for WO<sub>3</sub> nanoparticles at varying current densities**

**Table S1: Specific capacitance, energy density and power density values of WO<sub>3</sub> nanoparticles**

| <b>Current density<br/>(A/g)</b> | <b>Specific capacitance<br/>(F/g)</b> | <b>Energy density<br/>(W h Kg<sup>-1</sup>)</b> | <b>Power density<br/>(W Kg<sup>-1</sup>)</b> |
|----------------------------------|---------------------------------------|-------------------------------------------------|----------------------------------------------|
| 1                                | 186.4                                 | 23.3                                            | 900                                          |
| 2                                | 166.24                                | 20.78                                           | 1800                                         |
| 4                                | 148                                   | 18.5                                            | 3600                                         |
| 6                                | 110.52                                | 13.81                                           | 5398.04                                      |
| 8                                | 62.56                                 | 7.82                                            | 7200                                         |
| 10                               | 43                                    | 5.37                                            | 8991.62                                      |
